# Supplementary material for: Outcome of Fetal Dysrhythmias with and without Extracardiac Anomalies
Source: MDPI journal article supplement (doi:10.3390/diagnostics13030489), 2023-01-29
Supplement: s1 [file s1]

**Table S1. Characteristics of neonates with neonatal death**

| Nr | type of arrhythmia    | GA at diagnosis | CHD                  | ECA         | intrauterine treatment | GA at birth | APGAR | birthweight | sex | survivaltime (days) | cause of death            |
|----|-----------------------|-----------------|----------------------|-------------|------------------------|-------------|-------|-------------|-----|---------------------|---------------------------|
| 1  | Bradyarrhythmia       | 21+0            | HLHS,<br>Rhabdomyoma | 0           | 0                      | 38+6        | 5/7/7 | 2965        | f   | 125                 | Heart failure             |
| 2  | Tachyarrhythmia       | 27+6            | 0                    | 0           | Digoxin,Flecanoide     | 28+5        | 7/7/8 | 1390        | m   | 2                   | Neonatal sepsis           |
| 3  | Tachyarrhythmia       | 29+4            | 0                    | Analatresia | Digoxin                | 30+1        | 7/9/9 | 1760        | f   | 185                 | Respiratory insufficiency |
| 4  | Rhythm irregularities | 23+3            | Ebstein              | 0           | Digoxin                | 29+4        |       | 1865        | m   | 13                  | Heart failure             |
| 5  | Bradyarrhythmia       | 20+6            | TGA,DOLV             | Heterotaxia | 0                      | 34+1        | 3/1/0 | 4100        | m   | 0                   | Heart failure             |
| 6  | Rhythm irregularities | 26+5            | Ebstein              | 0           | 0                      | 31+3        | 6/8/9 | 1470        | m   | 7                   | Heart failure             |
| 7  | Tachyarrhythmia       | 21+2            | 0                    | 0           | 0                      | 23+4        | 6/8/9 | 550         | m   | 4                   | Heart failure             |
| 8  | Bradyarrhythmia       | 24+1            | 0                    | 0           | 0                      | 25+6        | 8/8/9 | 1046        | m   | 22                  | MODS                      |
| 9  | Tachyarrhythmia       | 12+5            | 0                    | 0           | 0                      | 29+0        | 1/0/0 | 836         | m   | 0                   | Pulmonary hypoplasia      |
